# Supplementary material for: Analysis of Conformational Preferences in Caffeine
Source: MDPI journal article supplement (doi:10.3390/molecules27061937), 2022-03-17
Supplement: s1 [file s1]

| Oct 29, 21 14:08                    |           | coordinates.xyz |           | Page 1/4 |
|-------------------------------------|-----------|-----------------|-----------|----------|
| 24                                  |           |                 |           |          |
| I Energy= -680.584790529 Hartrees   |           |                 |           |          |
| N                                   | 1.247565  | -1.106689       | 0.000075  |          |
| C                                   | 1.853775  | 0.163739        | 0.000026  |          |
| N                                   | 1.013563  | 1.270389        | 0.000100  |          |
| C                                   | -0.349039 | 1.091399        | 0.000058  |          |
| C                                   | -0.907080 | -0.171084       | 0.000086  |          |
| C                                   | -0.142374 | -1.379883       | 0.000009  |          |
| N                                   | -2.277591 | 0.037107        | -0.000090 |          |
| C                                   | -2.445750 | 1.381119        | 0.000012  |          |
| N                                   | -1.301758 | 2.058401        | -0.000058 |          |
| C                                   | 2.180881  | -2.240572       | 0.000007  |          |
| O                                   | 3.066355  | 0.286225        | -0.000027 |          |
| C                                   | 1.624833  | 2.601105        | -0.000058 |          |
| O                                   | -0.592781 | -2.518368       | -0.000133 |          |
| C                                   | -3.311394 | -0.992318       | 0.000053  |          |
| H                                   | -3.426840 | 1.831795        | -0.000023 |          |
| H                                   | 1.592575  | -3.153489       | -0.000096 |          |
| H                                   | 2.816830  | -2.196004       | 0.884308  |          |
| H                                   | 2.816907  | -2.195838       | -0.884227 |          |
| H                                   | 0.824527  | 3.336899        | 0.000151  |          |
| H                                   | 2.249907  | 2.722160        | -0.885334 |          |
| H                                   | 2.250361  | 2.722134        | 0.884896  |          |
| H                                   | -4.285276 | -0.503359       | -0.001073 |          |
| H                                   | -3.212240 | -1.620563       | 0.884800  |          |
| H                                   | -3.210908 | -1.622070       | -0.883455 |          |
| 24                                  |           |                 |           |          |
| II Energy= -680.584339663 Hartrees  |           |                 |           |          |
| N                                   | 1.250785  | 1.105003        | -0.000778 |          |
| C                                   | 1.864608  | -0.165026       | 0.000171  |          |
| N                                   | 1.018843  | -1.268508       | -0.000373 |          |
| C                                   | -0.344690 | -1.093116       | -0.000512 |          |
| C                                   | -0.906596 | 0.166995        | -0.000374 |          |
| C                                   | -0.137142 | 1.371880        | -0.000166 |          |
| N                                   | -2.276072 | -0.044058       | -0.000342 |          |
| C                                   | -2.440864 | -1.388853       | -0.000452 |          |
| N                                   | -1.295049 | -2.062891       | -0.000612 |          |
| C                                   | 2.124579  | 2.286236        | -0.000243 |          |
| O                                   | 3.075339  | -0.305385       | 0.001221  |          |
| C                                   | 1.628363  | -2.600552       | 0.000244  |          |
| O                                   | -0.569443 | 2.517410        | 0.000651  |          |
| C                                   | -3.311153 | 0.983924        | 0.000705  |          |
| H                                   | -3.420780 | -1.842050       | -0.000513 |          |
| H                                   | 1.929626  | 2.884841        | 0.890141  |          |
| H                                   | 1.911754  | 2.897376        | -0.877717 |          |
| H                                   | 3.155327  | 1.947477        | -0.012400 |          |
| H                                   | 0.826817  | -3.334941       | -0.000318 |          |
| H                                   | 2.252834  | -2.722287       | 0.885764  |          |
| H                                   | 2.254201  | -2.722420       | -0.884285 |          |
| H                                   | -4.284582 | 0.494121        | -0.003505 |          |
| H                                   | -3.209929 | 1.616023        | -0.881107 |          |
| H                                   | -3.214608 | 1.609902        | 0.887458  |          |
| 24                                  |           |                 |           |          |
| III Energy= -680.584509225 Hartrees |           |                 |           |          |
| N                                   | 1.263651  | -1.092094       | -0.000146 |          |
| C                                   | 1.861058  | 0.184258        | -0.000115 |          |
| N                                   | 1.003373  | 1.281546        | -0.000466 |          |
| C                                   | -0.354989 | 1.080203        | -0.000191 |          |
| C                                   | -0.902617 | -0.185650       | -0.000168 |          |
| C                                   | -0.122882 | -1.384306       | 0.000100  |          |
| N                                   | -2.273904 | 0.011964        | 0.000193  |          |
| C                                   | -2.452494 | 1.355346        | 0.000251  |          |
| N                                   | -1.313382 | 2.041564        | 0.000087  |          |
| C                                   | 2.208725  | -2.216865       | 0.000007  |          |
| O                                   | 3.073726  | 0.302745        | 0.000110  |          |
| C                                   | 1.542863  | 2.642658        | 0.000064  |          |
| O                                   | -0.558131 | -2.528443       | 0.000328  |          |
| C                                   | -3.299547 | -1.025627       | -0.000196 |          |
| H                                   | -3.437318 | 1.797819        | 0.000461  |          |

| Oct 29, 21 14:08 |           | coordinates.xyz |           | Page 2/4 |
|------------------|-----------|-----------------|-----------|----------|
| H                | 1.629591  | -3.135554       | 0.000142  |          |
| H                | 2.844212  | -2.165686       | 0.884186  |          |
| H                | 2.844184  | -2.165932       | -0.884210 |          |
| H                | 1.201657  | 3.174512        | 0.889547  |          |
| H                | 1.194184  | 3.177694        | -0.884534 |          |
| H                | 2.626668  | 2.573815        | -0.004436 |          |
| H                | -4.277345 | -0.544615       | 0.003059  |          |
| H                | -3.192775 | -1.655834       | 0.882259  |          |
| H                | -3.196687 | -1.651590       | -0.886178 |          |
| 24               |           |                 |           |          |
| IV Energy=       |           | -680.583959073  | Hartrees  |          |
| N                | -1.268056 | -1.089346       | -0.000854 |          |
| C                | -1.872708 | 0.187287        | -0.000024 |          |
| N                | -1.007899 | 1.280589        | -0.000019 |          |
| C                | 0.351230  | 1.081408        | -0.000365 |          |
| C                | 0.902040  | -0.182454       | -0.000537 |          |
| C                | 0.116836  | -1.376989       | 0.000096  |          |
| N                | 2.272514  | 0.017341        | 0.000013  |          |
| C                | 2.448597  | 1.361587        | 0.000260  |          |
| N                | 1.307951  | 2.045017        | 0.000080  |          |
| C                | -2.154112 | -2.262249       | -0.000531 |          |
| O                | -3.083119 | 0.324514        | 0.000544  |          |
| C                | -1.542727 | 2.644203        | 0.000210  |          |
| O                | 0.532085  | -2.528246       | 0.001265  |          |
| C                | 3.298932  | -1.019255       | -0.000402 |          |
| H                | 3.432662  | 1.805949        | 0.000475  |          |
| H                | -1.965151 | -2.862694       | 0.890008  |          |
| H                | -1.946738 | -2.875573       | -0.877889 |          |
| H                | -3.181617 | -1.914250       | -0.013109 |          |
| H                | -1.200126 | 3.174572        | -0.889701 |          |
| H                | -1.190301 | 3.177609        | 0.884374  |          |
| H                | -2.626703 | 2.580214        | 0.006088  |          |
| H                | 4.276577  | -0.537766       | 0.002339  |          |
| H                | 3.196413  | -1.645476       | -0.886436 |          |
| H                | 3.193149  | -1.649157       | 0.882594  |          |
| 24               |           |                 |           |          |
| V Energy=        |           | -680.584106516  | Hartrees  |          |
| N                | -1.254699 | -1.101433       | -0.000223 |          |
| C                | -1.855659 | 0.171807        | -0.000283 |          |
| N                | -1.008652 | 1.272106        | -0.000179 |          |
| C                | 0.352987  | 1.084759        | -0.000134 |          |
| C                | 0.908792  | -0.179418       | -0.000224 |          |
| C                | 0.132946  | -1.383582       | -0.000225 |          |
| N                | 2.281486  | 0.028982        | 0.000046  |          |
| C                | 2.449948  | 1.372844        | 0.000052  |          |
| N                | 1.306844  | 2.050625        | 0.000098  |          |
| C                | -2.194710 | -2.230160       | 0.000088  |          |
| O                | -3.067450 | 0.300058        | 0.000342  |          |
| C                | -1.611563 | 2.606745        | 0.000178  |          |
| O                | 0.568889  | -2.528566       | 0.000138  |          |
| C                | 3.330707  | -0.991721       | -0.000019 |          |
| H                | 3.430954  | 1.824355        | 0.000164  |          |
| H                | -1.612543 | -3.146938       | -0.000318 |          |
| H                | -2.830837 | -2.181265       | -0.883922 |          |
| H                | -2.829994 | -2.181573       | 0.884731  |          |
| H                | -0.806966 | 3.337830        | -0.000022 |          |
| H                | -2.235832 | 2.731362        | 0.885620  |          |
| H                | -2.236437 | 2.731504        | -0.884812 |          |
| H                | 2.853075  | -1.968575       | 0.000306  |          |
| H                | 3.950996  | -0.888926       | 0.891943  |          |
| H                | 3.950538  | -0.889302       | -0.892344 |          |
| 24               |           |                 |           |          |
| VI Energy=       |           | -680.583720599  | Hartrees  |          |
| N                | -1.256739 | 1.100577        | 0.000203  |          |
| C                | -1.866267 | -0.172316       | 0.000224  |          |
| N                | -1.014849 | -1.269994       | 0.000162  |          |
| C                | 0.348157  | -1.087413       | 0.000097  |          |
| C                | 0.908044  | 0.174018        | 0.000149  |          |
| C                | 0.128931  | 1.375091        | 0.000093  |          |

| Oct 29, 21 14:08                     |           | coordinates.xyz |           | Page 3/4 |
|--------------------------------------|-----------|-----------------|-----------|----------|
| N                                    | 2.279470  | -0.037132       | -0.000076 |          |
| C                                    | 2.444497  | -1.381807       | -0.000105 |          |
| N                                    | 1.299342  | -2.056260       | -0.000110 |          |
| C                                    | -2.136760 | 2.277446        | -0.000002 |          |
| O                                    | -3.076203 | -0.317097       | -0.000193 |          |
| C                                    | -1.617260 | -2.605376       | -0.000112 |          |
| O                                    | 0.549156  | 2.526042        | -0.000140 |          |
| C                                    | 3.328557  | 0.983460        | 0.000020  |          |
| H                                    | 3.424168  | -1.836136       | -0.000210 |          |
| H                                    | -3.165757 | 1.932865        | 0.000427  |          |
| H                                    | -1.936410 | 2.883139        | -0.884319 |          |
| H                                    | -1.935852 | 2.883787        | 0.883736  |          |
| H                                    | -0.812166 | -3.335903       | -0.000094 |          |
| H                                    | -2.241711 | -2.730325       | -0.885324 |          |
| H                                    | -2.241957 | -2.730539       | 0.884892  |          |
| H                                    | 2.850331  | 1.960196        | -0.000267 |          |
| H                                    | 3.949104  | 0.881046        | -0.891829 |          |
| H                                    | 3.948665  | 0.881355        | 0.892212  |          |
| 24                                   |           |                 |           |          |
| VII Energy= -680.583854050 Hartrees  |           |                 |           |          |
| N                                    | 1.270508  | -1.086887       | -0.000151 |          |
| C                                    | 1.862791  | 0.192105        | -0.000619 |          |
| N                                    | 0.998585  | 1.283061        | -0.000236 |          |
| C                                    | -0.358713 | 1.073766        | -0.000155 |          |
| C                                    | -0.904245 | -0.193653       | -0.000095 |          |
| C                                    | -0.113740 | -1.387678       | -0.000170 |          |
| N                                    | -2.277570 | 0.004114        | -0.000000 |          |
| C                                    | -2.456525 | 1.347344        | -0.000132 |          |
| N                                    | -1.318224 | 2.034098        | -0.000017 |          |
| C                                    | 2.222106  | -2.206594       | 0.000295  |          |
| O                                    | 3.074631  | 0.316435        | 0.000354  |          |
| C                                    | 1.529681  | 2.647484        | 0.000010  |          |
| O                                    | -0.534793 | -2.538004       | 0.000111  |          |
| C                                    | -3.318191 | -1.025322       | 0.000313  |          |
| H                                    | -3.441267 | 1.790644        | -0.000095 |          |
| H                                    | 1.649026  | -3.129044       | 0.000532  |          |
| H                                    | 2.857153  | -2.151260       | 0.884653  |          |
| H                                    | 2.857302  | -2.151782       | -0.883987 |          |
| H                                    | 2.614041  | 2.585038        | -0.000172 |          |
| H                                    | 1.181738  | 3.178736        | 0.887276  |          |
| H                                    | 1.181474  | 3.179119        | -0.886920 |          |
| H                                    | -2.832208 | -1.998151       | -0.000108 |          |
| H                                    | -3.939430 | -0.927890       | -0.891517 |          |
| H                                    | -3.938592 | -0.928258       | 0.892769  |          |
| 24                                   |           |                 |           |          |
| VIII Energy= -680.583366377 Hartrees |           |                 |           |          |
| N                                    | -1.273873 | -1.084716       | 0.000008  |          |
| C                                    | -1.873782 | 0.194193        | 0.000358  |          |
| N                                    | -1.003927 | 1.281850        | 0.000128  |          |
| C                                    | 0.354504  | 1.075959        | 0.000059  |          |
| C                                    | 0.903390  | -0.189142       | -0.000023 |          |
| C                                    | 0.108418  | -1.379074       | 0.000034  |          |
| N                                    | 2.275619  | 0.010542        | -0.000006 |          |
| C                                    | 2.452041  | 1.354499        | 0.000099  |          |
| N                                    | 1.312072  | 2.038599        | 0.000045  |          |
| C                                    | -2.165442 | -2.253709       | -0.000241 |          |
| O                                    | -3.083727 | 0.335991        | -0.000047 |          |
| C                                    | -1.531474 | 2.648317        | 0.000111  |          |
| O                                    | 0.511870  | -2.535780       | -0.000043 |          |
| C                                    | 3.315403  | -1.019499       | -0.000254 |          |
| H                                    | 3.435765  | 1.799999        | 0.000109  |          |
| H                                    | -3.191206 | -1.900397       | -0.000647 |          |
| H                                    | -1.970520 | -2.861434       | 0.883887  |          |
| H                                    | -1.969814 | -2.861555       | -0.884123 |          |
| H                                    | -2.615796 | 2.589932        | 0.000288  |          |
| H                                    | -1.181255 | 3.178358        | -0.886961 |          |
| H                                    | -1.180975 | 3.178467        | 0.887007  |          |
| H                                    | 2.828223  | -1.991911       | 0.000129  |          |
| H                                    | 3.936792  | -0.922984       | 0.891593  |          |

| Oct 29, 21 14:08 |          | coordinates.xyz |           | Page 4/4 |
|------------------|----------|-----------------|-----------|----------|
| H                | 3.936067 | -0.923335       | -0.892647 |          |
